# Supplementary material for: Efficacy and safety of cryoablation procedures using mouse models of bladder cancer
Source: Research Square preprint supplement (doi:10.21203/rs.3.rs-7903080/v1), 2025-12-05
Supplement: Supplementary file 1 [file bd65fca91e88137fbb9b273f.docx]

**Efficacy and safety of cryoablation procedures using mouse models of bladder cancer**

**Shogo Inui, Saya Ito*, Takashi Ueda,Takumi Shiraishi, Atsuko Fujihara, Yuta Inoue, Hideto Taga, Osamu Ukimura**

Department of Urology, Graduate School of Medical Science, Kyoto Prefectural University of Medicine, Kyoto-City, Kyoto 602-8566, Japan

**Shogo Inui** and **Saya Ito** contributed equally to this work

***Corresponding author.**

Saya Ito

Department of Urology, Graduate School of Medical Science, Kyoto Prefectural University of Medicine, Kyoto-City, Kyoto 602-8566, Japan

FAX: +81 75 251 5598

TEL: +81 75 251 5595

E-mail: [itosaya@koto.kpu-m.ac.jp](mailto:itosaya@koto.kpu-m.ac.jp)

**Supplementary Information**


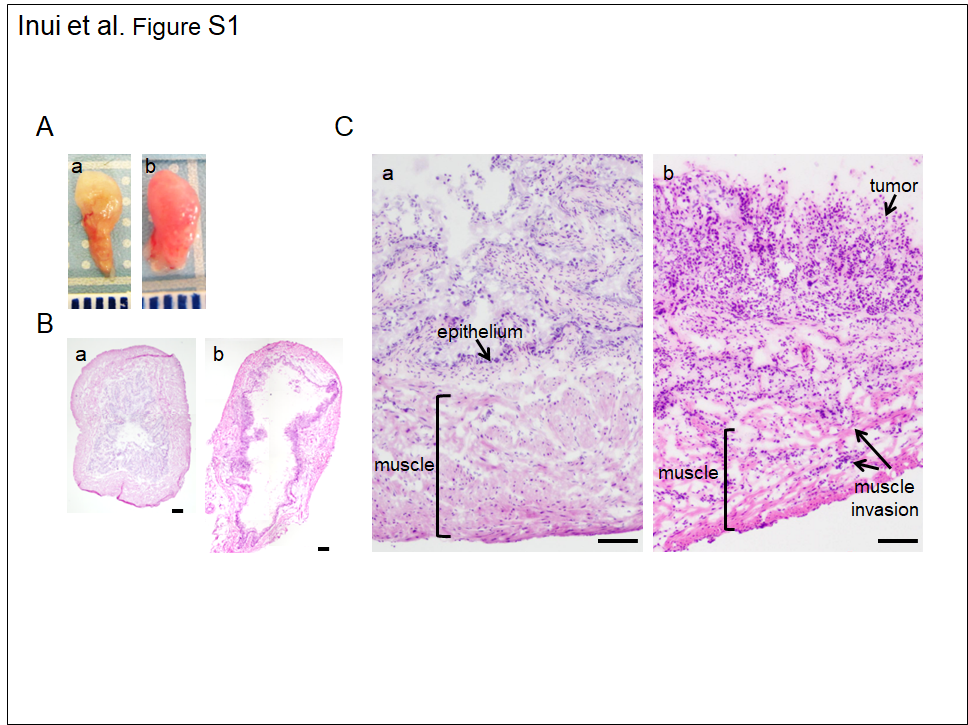
 **Fig. S1.**

Generation of model bladder cancer mice: (A) Macroscopic appearance of non-BBN-treated mice (a) and BBN-treated mice (b). (B) Histopathological evaluation of non-BBN-treated mice (a) and BBN-treated mice (b). Histopathological evaluation, H&E-stained image, magnification 40×, Scale bars indicate 300 μm. (C) H&E-stained image as in Fig. S1B, magnification 100×, Scale bars indicate 100 μm.


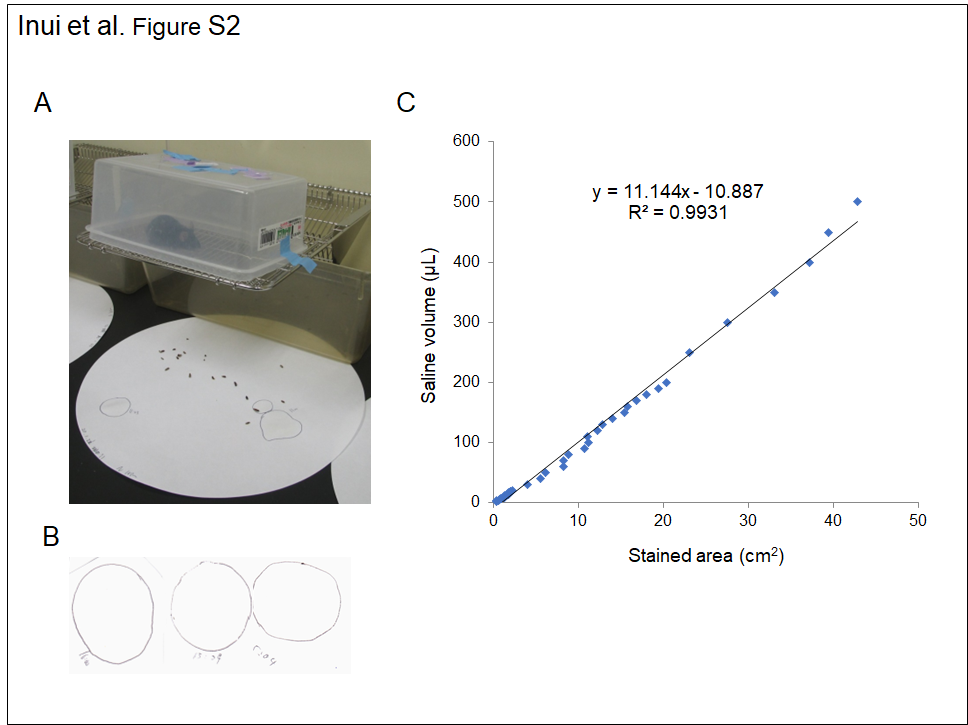
 **Fig. S2.**

VSOP method: (A) Mice were placed on a wire-netted cage cover 20 cm above the filter paper. (B) As shown in the example in the photograph, urination time and urine spots were recorded on filter paper over a 2-h. (C) There was a linear correlation between liquid volume and stained areas on the filter paper within the range of 2 to 500 μL (y = 11.144x – 10.887, R² = 0.9931).


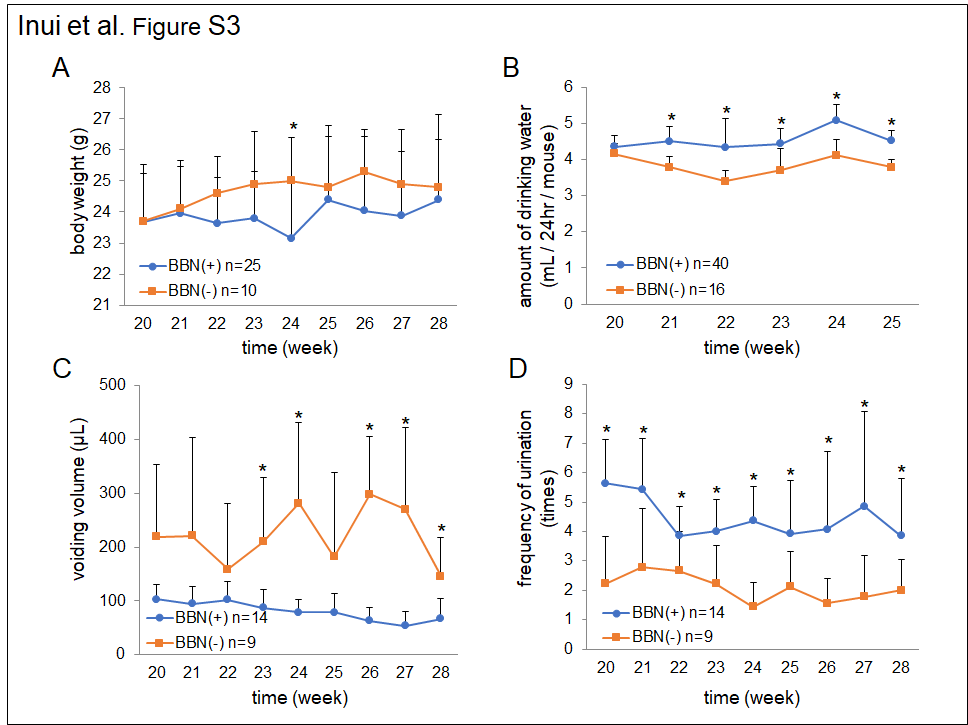
 **Fig. S3.**

Influence of BBN administration on physiological effects in mice: (A) Body weight changes after BBN treatment. (B) Changes in amount of water consumed. (C) Voiding volume. (D) Frequency of urination. Asterisk indicates p < 0.05.


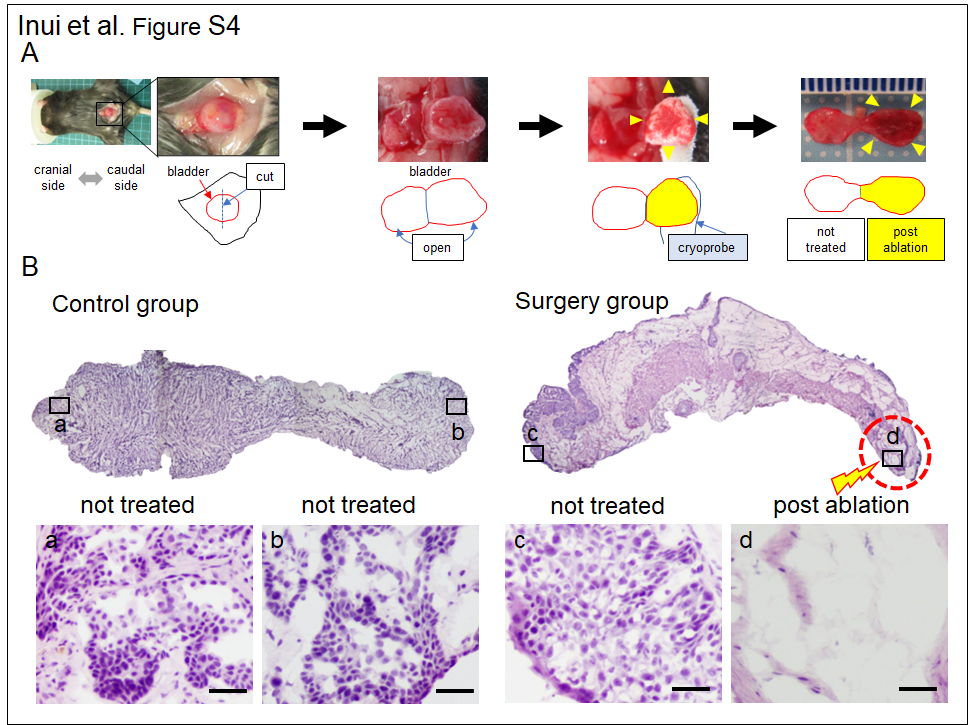
 **Fig. S4.**

Therapeutic efficacy of cryoablation on bladder tissues: (A) In the efficacy validation experiment, the bladder was divided into two sections and cryoablation was performed on one side only. (B) H&E-stained images, magnification × 40 (top images) and × 200 (bottom images). The areas labeled **a**, **b**, **c**, and **d** in the bottom image correspond to the boxed regions in the top image. Scale bars indicate 25 μm. The **d**-area is the cryoablated region.


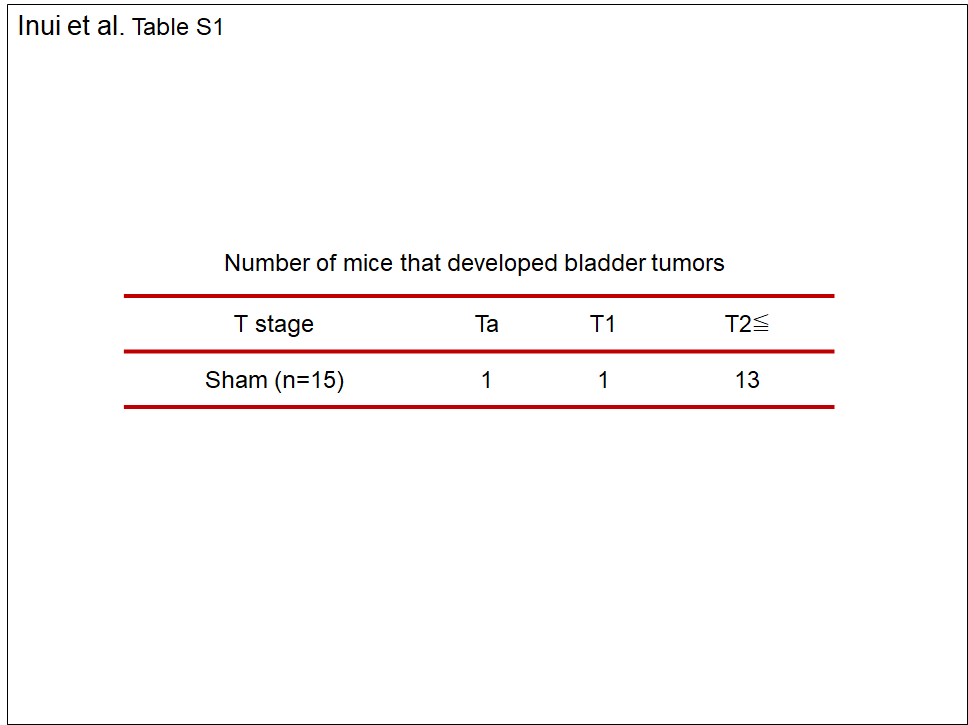


**Table S1.** Number of mice that developed bladder tumors

| sample No. | group | Tumor size with cryoablation | | | BW (g) |
| --- | --- | --- | --- | --- | --- |
| length (mm) | width (mm) | height (mm) |
| 1 | POD0 | 5.3 | 4.9 | 3 | 23 |
| 2 | 4.5 | 4 | 2.8 | 26 |
| 3 | 4.5 | 3.7 | 3.5 | 27 |
| 4 | 4.1 | 4.1 | 2.5 | 23 |
| 5 | 4.2 | 3.9 | 2.4 | 22 |
| 6 | 4.6 | 3.8 | 2.2 | 22 |
| 7 | 4.5 | 4.2 | 3.6 | 23 |
| 8 | 5.3 | 4 | 2.9 | 24 |
| 9 | 4.3 | 3.7 | 2.5 | 23 |
| 10 | 4.3 | 3.8 | 2.3 | 22 |
| 11 | 4 | 4 | 2.5 | 26 |
| 12 | POD1 | 3.6 | 3.6 | 2.7 | 21 |
| 13 | 4.2 | 3.5 | 3 | 24 |
| 14 | 4 | 3.9 | 3 | 24 |
| 15 | 4 | 3.8 | 2.8 | 21 |
| 16 | 4.4 | 3.7 | 2.6 | 20 |
| 17 | 4.6 | 4.1 | 2.6 | 20 |
| 18 | 4.6 | 4.2 | 2.6 | 21 |
| 19 | 4.4 | 4.3 | 3 | 22 |
| 20 | 5.3 | 3.7 | 1.8 | 21 |
| 21 | 5.5 | 4.6 | 3.1 | 20 |
| 22 | 4.9 | 4 | 2.6 | 23 |
| 23 | 5.3 | 3.6 | 3.6 | 20 |
| 24 | POD3 | 3 | 3 | 2 | 21 |
| 25 | 3.8 | 3.8 | 2.2 | 23 |
| 26 | 3.5 | 3 | 2.4 | 23 |
| 27 | 5.2 | 4.7 | 4 | 22 |
| 28 | 3.9 | 3.2 | 2.4 | 22 |
| 29 | 3.9 | 2.8 | 2.8 | 20 |
| 30 | 3.8 | 3.6 | 2.5 | 21 |
| 31 | 3.9 | 3.9 | 3.2 | 22 |
| 32 | 4.1 | 3.9 | 3.1 | 22 |
| 33 | 3.6 | 3.5 | 2.8 | 21 |
| 34 | 3.8 | 3.4 | 3 | 24 |
| 35 | 4.6 | 3.6 | 2.1 | 20 |
| 36 | 3.3 | 3 | 2 | 23 |
| 37 | 3.5 | 3.3 | 3.3 | 29 |
| 38 | POD7 | 2.2 | 2.1 | 1.4 | 22 |
| 39 | 2 | 1.7 | 1 | 25 |
| 40 | 2 | 1.7 | 1.5 | 24 |
| 41 | 2.6 | 1.9 | 1.4 | 22 |
| 42 | 2.5 | 2.4 | 1.4 | 22 |
| 43 | 2.7 | 2.6 | 1.5 | 22 |
| 44 | 1.8 | 1.7 | 1.4 | 22 |
| 45 | 2.4 | 2.2 | 1.7 | 23 |
| 46 | 2.2 | 2.1 | 1.4 | 22 |
| 47 | 2.6 | 2.5 | 1.9 | 21 |
| 48 | 3.3 | 2.3 | 1.9 | 25 |
| 49 | 3.2 | 2.8 | 1.6 | 20 |
| 50 | 3.9 | 3.1 | 2 | 23 |
| 51 | 2.2 | 1.8 | 1.1 | 28 |
| 52 | POD14 | 1.5 | 0.9 | 1.2 | 22 |
| 53 | 1.3 | 1.3 | 1.1 | 25 |
| 54 | 0 | 0 | 0 | 25 |
| 55 | 0 | 0 | 0 | 23 |
| 56 | 2.8 | 2.8 | 1.7 | 23 |
| 57 | 2 | 1 | 1 | 21 |
| 58 | 2.9 | 1.2 | 1 | 23 |
| 59 | 0 | 0 | 0 | 24 |
| 60 | 1.7 | 1.7 | 0 | 23 |
| 61 | 1.9 | 1.5 | 0.8 | 22 |
| 62 | 2.5 | 1.9 | 1.4 | 27 |
| 63 | 3 | 2.4 | 1.8 | 20 |
| 64 | 3.4 | 3.3 | 2.4 | 25 |
| 65 | POD28 | 2.7 | 2.3 | 1.2 | 24 |
| 66 | 2.8 | 2.1 | 1 | 31 |
| 67 | 0 | 0 | 0 | 26 |
| 68 | 0 | 0 | 0 | 27 |
| 69 | 3.1 | 2.3 | 1 | 25 |
| 70 | 3.5 | 1.9 | 1.2 | 25 |
| 71 | 0 | 0 | 0 | 26 |

**Table S2.** Measurements at each time point following cryoablation in each individual animal.
